# Supplementary material for: Extracellular Vesicle lincRNA-p21 Expression in Tumor-Draining Pulmonary Vein Defines Prognosis in NSCLC and Modulates Endothelial Cell Behavior
Source: MDPI journal article supplement (doi:10.3390/cancers12030734), 2020-03-20

**Supplementary Figure 1.** Comparison of Kaplan-Meier survival analysis between EV lincRNA-p21 expression and time to relapse (TTR) and overall survival (OS) in paired tumor-draining pulmonary vein and peripheral vein samples (n=44). **(A)** TTR according to pulmonary vein EV lincRNA-p21 expression. **(B)** TTR according to peripheral vein EV lincRNA-p21 expression. **(C)** OS according to pulmonary vein EV lincRNA-p21 expression. **(D)** OS according to peripheral vein EV lincRNA-p21 expression.

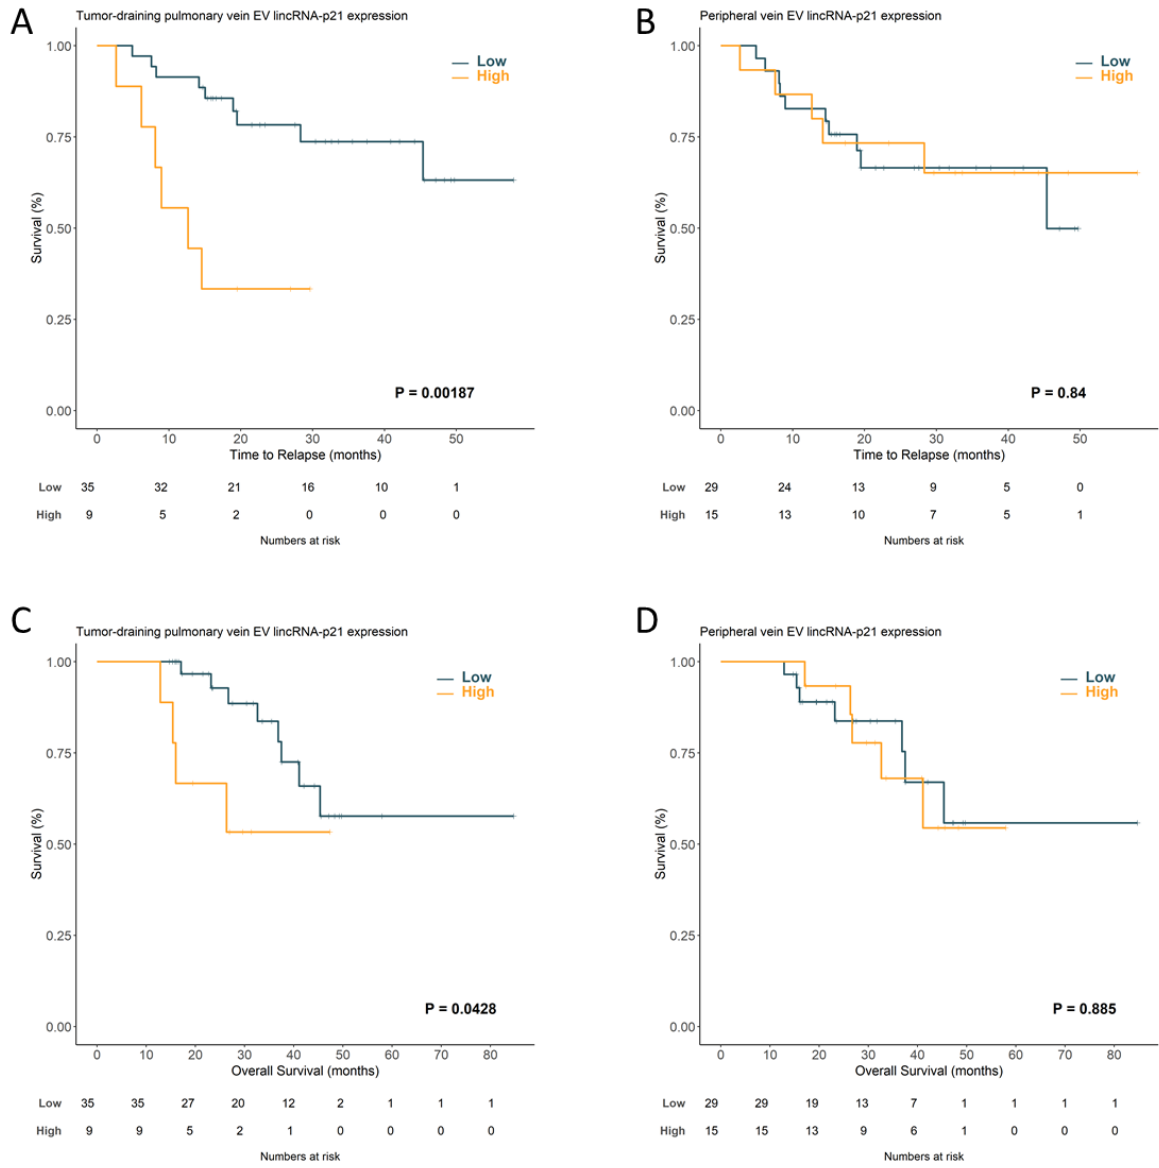

Supplement: s1 [file s1]
