# Supplementary material for: Extracellular Vesicle lincRNA-p21 Expression in Tumor-Draining Pulmonary Vein Defines Prognosis in NSCLC and Modulates Endothelial Cell Behavior
Source: MDPI journal article supplement (doi:10.3390/cancers12030734), 2020-03-20

**Supplementary Figure 3:** Time-dependent ROC curve estimation from censored survival data using survivalROC package of R and the results for the 6, 12, 24 and 36 months. LincRNA-p21 dichotomized expression according to prognostic cutoff value was used.

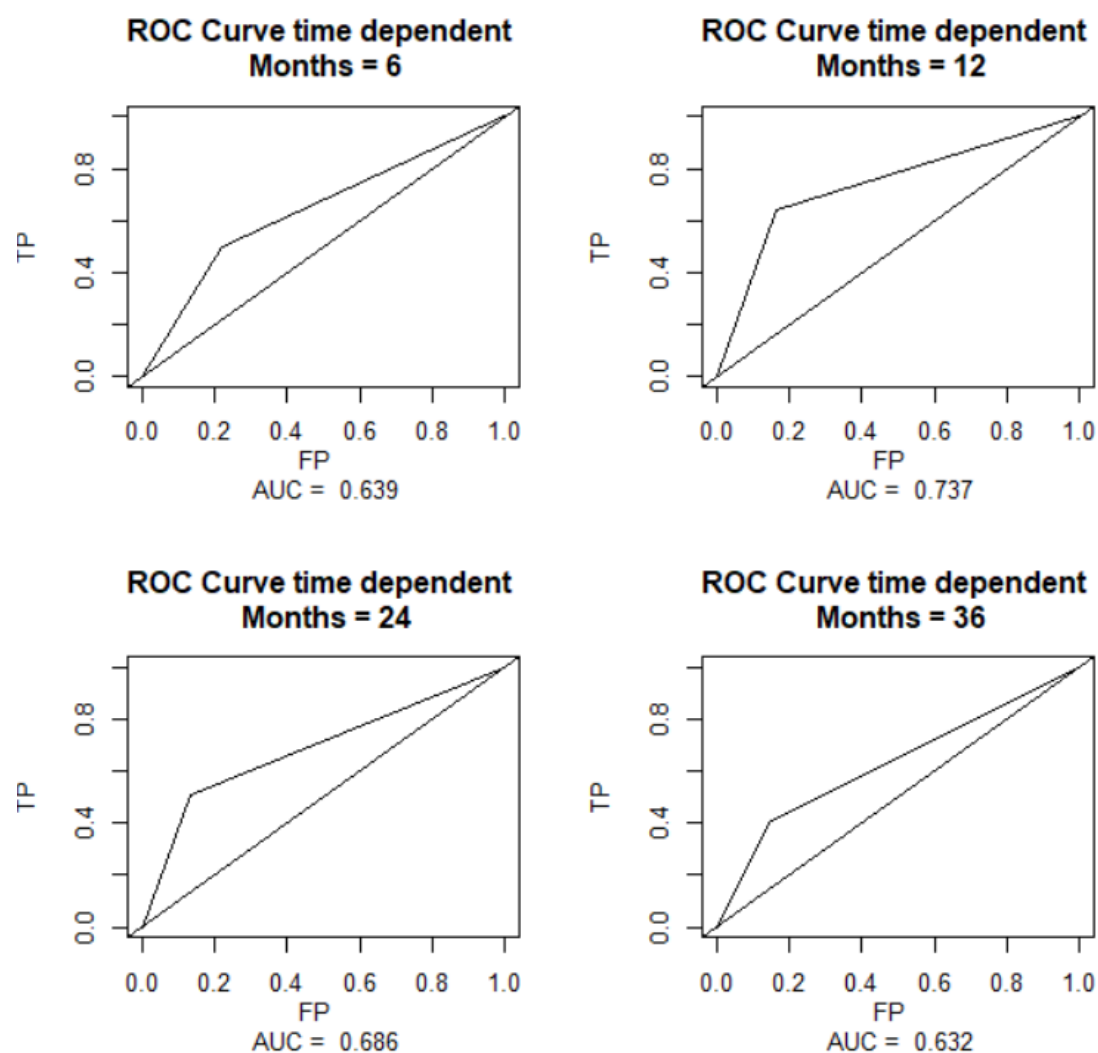

Supplement: s1 [file s1]
